# Supplementary material for: The E3 Ubiquitin Ligase ATL9 Affects Expression of Defense Related Genes, Cell Death and Callose Deposition in Response to Fungal Infection
Source: MDPI journal article supplement (doi:10.3390/pathogens11010068), 2022-01-05
Supplement: s1 [file s1]

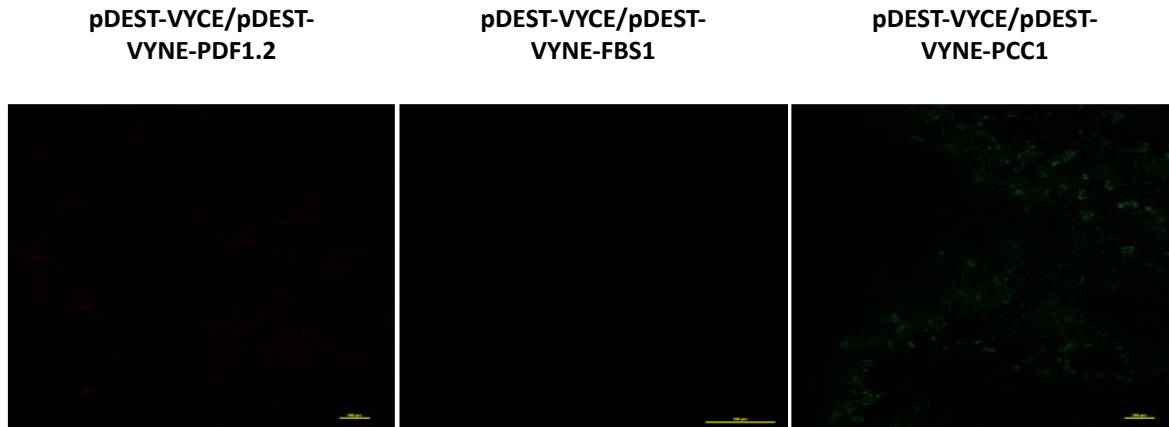

**Figure S1. Negative control of bimolecular fluorescence complementation assay.** pDEST-VYCE was transiently coexpressed with pDEST-VYNE-FBS1, pDEST-VYNE-PCC1, and pDEST-VYNE-PDF1.2 in tobacco leaves. Fluorescence emission was observed under the confocal microscope. Results showed that yellow fluorescence is not caused by the vector used for cloning *ATL9*.

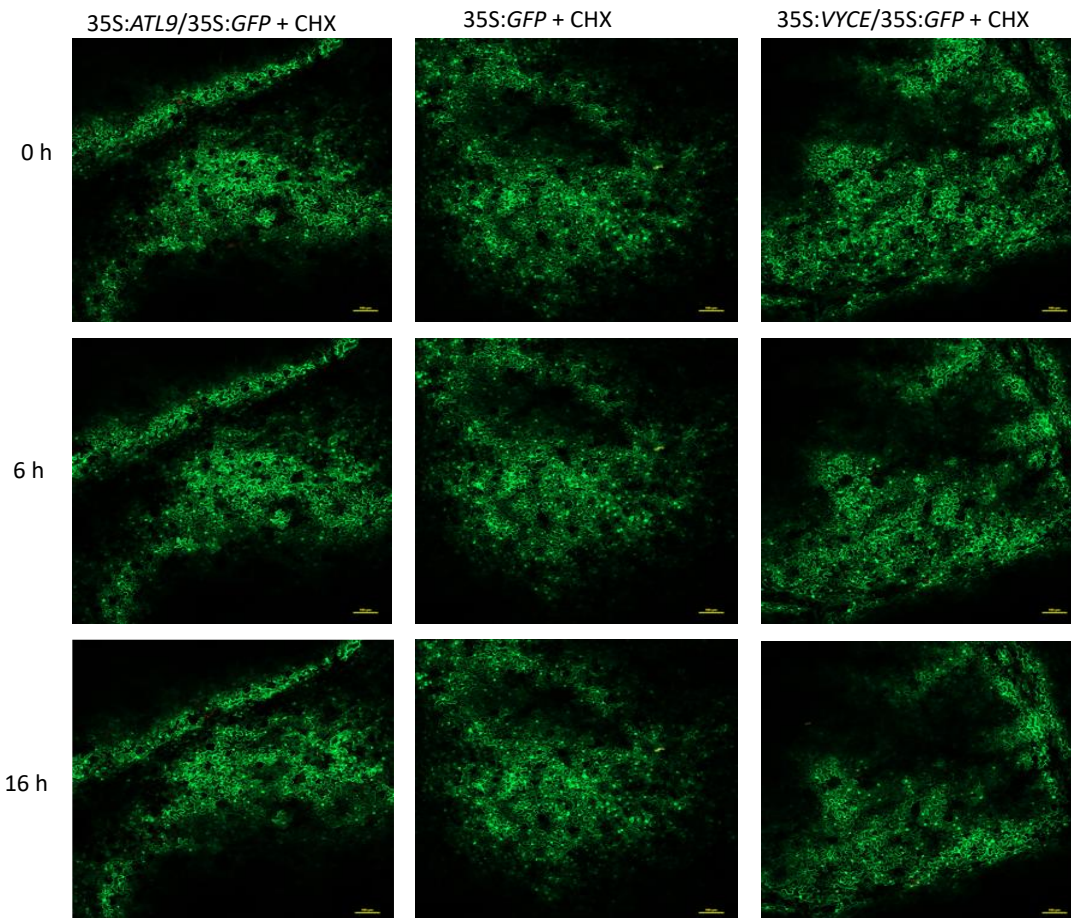

**Figure S2. Controls used in in vivo ubiquitination Assay.** To examine whether degradation could be caused by the vectors used in the experiment, 35S:ATL9 was transiently co-expressed with 35S:GFP in *N. benthamiana*. In addition, 35S:VYCE used to construct the overexpression ATL9 line was co-transformed with 35S:GFP in *N. benthamiana*. We also investigated whether 35S:GFP would degrade on its own

under experimental conditions. After 36 hours incubation, leaves were treated with either 100  $\mu$ M CHX or 100  $\mu$ M CHX plus 100  $\mu$ M MG132 before observation and then fluorescence emission was monitored using confocal microscope.
